# Supplementary material for: Mesoporous carbon confined palladium–copper alloy composites for high performance nitrogen selective nitrate reduction electrocatalysis
Source: Royal Society of Chemistry journal article supplement (doi:10.1039/c6nj03994d), 2017-01-01
Supplement: c6nj03994d1.pdf [file c6nj03994d1.pdf]

## Supporting Information

### **Mesoporous carbon confined palladium-copper alloy composites for high performance nitrogen selective nitrate reduction electrocatalysis**

Jianwei Fan,<sup>\*a</sup> Huawei Xu,<sup>a</sup> Menghua Lv,<sup>a</sup> Jinxiu Wang,<sup>c</sup> Wei Teng,<sup>a</sup> Xianqiang Ran,<sup>a</sup> Xiao Gou,<sup>a</sup> Xiaomin Wang,<sup>a</sup> Yu Sun<sup>d</sup> and Jianping Yang<sup>\*a,b</sup>

<sup>a</sup> College of Environmental Science and Engineering, State Key Laboratory of Pollution Control and Resources Reuse, Tongji University, Shanghai 200092, P. R. China

<sup>b</sup> State Key Laboratory for Modification of Chemical Fibers and Polymer Materials, College of Materials Science and Engineering, Donghua University, Shanghai 201620, P. R. China.

<sup>c</sup> Department of Chemistry and Laboratory of Advanced Materials, Fudan University, Shanghai 200433, P. R. China

<sup>d</sup> Shanghai Tongji Clearon Environmental-Protection Equipment Engineering Co., Ltd, Shanghai 200092, P. R. China

E-mail: fanjianwei@tongji.edu.cn; jianpingyang@dhu.edu.cn

Tel: +86-21-65985885

**Table S1.** Element contents of PdCu@OMC obtained from EDX results.

| Element               | C     | Pd    | Cu   |
|-----------------------|-------|-------|------|
| Weight percentage (%) | 77.58 | 17.42 | 4.99 |
| Atom percentage (%)   | 96.38 | 2.44  | 1.17 |
